# Supplementary material
Source: PubMed Central journal article supplement (PMC11488454)
Supplement: biolreprod_90_5_98_1-8_s0.pdf [file biolreprod_90_5_98_1-8_s0.pdf]

Supplemental Table S1. Primers used for quantitative RT-PCR.

| mRNA                      | Forward                         | Reverse                       | Genbank/EMBL<br>Accession no. | Nucleotide<br>no. |
|---------------------------|---------------------------------|-------------------------------|-------------------------------|-------------------|
| <i>PTGS2/<br/>COX-2</i>   | 5'-TGTGCAACACTTGAGTGG CT-3'     | 5'-ACTTTCTGTACTGCGGGTGG-3'    | AY151286                      | 1381-1677         |
| <i>PTGES/<br/>mPGES-1</i> | 5'-TCTTAGCCCCTTGATTCT-3'        | 5'-ATTCTTAGCCCGGGATTGAG-3'    | BC008280                      | 695-898           |
| <i>GAPDH</i>              | 5'-TGATGACATCAAGAAGGTGGTGAAG-3' | 5'-TCCTTGGAGGCCATGTAGGCCAT-3' | BC014085                      | 1644-1883         |

**Supplemental Table S2. Demographic characteristics of the pregnancies used in the DNA methylome study using MeDIP.**

| Study group                           | (a) TL (n = 11)                                  | (b) TNL-s (n = 10)                                        | (c) TNL-l (n = 9)                   | (d) PTNL (n = 10)                                    | (e) iPTL (n = 6)                     | (f) tPTL (n = 7)                     |
|---------------------------------------|--------------------------------------------------|-----------------------------------------------------------|-------------------------------------|------------------------------------------------------|--------------------------------------|--------------------------------------|
| Maternal age (yrs)                    | 34.7 ± 4.0 (28; 41)                              | 27.8 ± 4.3 (22; 35)                                       | 32.8 ± 2.7 (27; 36)                 | 33.2 ± 6.0 (24; 40)                                  | 32.8 ± 6.7 (23; 40)                  | 34.6 ± 11.1 (20; 55)                 |
| Parity                                | 0.7 ± 0.5 (0; 1)                                 | 1.4 ± 0.7 (0; 2)                                          | 0.7 ± 0.5 (0; 1)                    | 0.7 ± 0.8 (0; 2)                                     | 1.0 ± 1.3 (0; 3)                     | 0.1 ± 0.4 (0; 1) <sup>a</sup>        |
| Maternal BMI (kg/m <sup>2</sup> )     | 23.9 ± 3.0 (20; 29) <sup>a</sup>                 | 32.0 ± 4.4 (25; 41)                                       | 25.0 ± 8.5 (19; 45)                 | 25.7 ± 6.5 (19; 35)                                  | 23.8 ± 4.1 (19; 29)                  | 24.3 ± 6.3 (18; 35)                  |
| No. of women smoking during pregnancy | 0                                                | 0                                                         | 0                                   | 0 <sup>c</sup>                                       | 0 <sup>d</sup>                       | 0                                    |
| Race/Ethnicity                        | White (6) <sup>e</sup><br>Black (2)<br>Asian (1) | Hispanic White (8)<br>Non-Hispanic White (1)<br>Asian (1) | White (5) <sup>f</sup><br>Black (1) | White (5) <sup>c</sup><br>Black (2)<br>Pakistani (1) | White (5) <sup>d</sup>               | White (6) <sup>f</sup>               |
| Birth weight (g)                      | 3360 ± 373 (2670; 3990)                          | 3316 ± 268 (2987; 3731)                                   | 3612 ± 357 (3070; 4280)             | 1966 ± 544 (1225; 3110) <sup>b</sup>                 | 2403 ± 462 (2090; 3160) <sup>b</sup> | 2072 ± 486 (1523; 2855) <sup>b</sup> |
| No. of boys/girls                     | 7/4                                              | 6/4                                                       | 6/3                                 | 4/6                                                  | 2/4                                  | 9/5                                  |
| IUGR (< 2500 g)                       | 0                                                | 0                                                         | 0                                   | 9                                                    | 4                                    | 5                                    |
| Macrosomia (≥ 4000 g)                 | 0                                                | 0                                                         | 1                                   | 0                                                    | 0                                    | 0                                    |

Data are given as mean ± SD with range in parentheses, except where indicated differently. <sup>a</sup>\*p<0.05 vs TNL-s group with one-way ANOVA followed by Bonferroni's post-hoc comparisons tests. <sup>b</sup>\*\*p<0.01 vs. TL, TNL-s and TNL-l. <sup>c,d,e,f</sup>Data of 8, 5, 9 and 6 pregnancies.

**Supplemental Table S3. Control gene methylation detected in the human myometrium.**

| Positive controls                              | Locus    | Cytosine methylation | CpG island | Peak score <sup>#</sup>  |
|------------------------------------------------|----------|----------------------|------------|--------------------------|
| <i>TSH2B</i> ( <i>HIST1H2BA</i> ) <sup>§</sup> | 6p22.2   | Detected             | 5'         | 4.63 ± 0.46 (4.22; 5.41) |
| <i>H1T</i> ( <i>HIST1H1T</i> ) <sup>§</sup>    | 6p21.3   | Detected             | 5'         | 3.39 ± 0.30 (3.12; 3.89) |
| <i>PRM1</i> (protamine 1)                      | 16p13.2  | Detected             | 3'         | 3.23 ± 0.37 (2.83; 3.75) |
| Negative controls                              |          |                      |            |                          |
| <i>GAPDH</i>                                   | 12p13.31 | Not detected         | 5'         | N/A                      |
| <i>HIST1H1E</i>                                | 6p21.3   | Not detected         | 5'         | N/A                      |
| <i>HIST1H2AC</i>                               | 6p22.1   | Not detected         | 5'         | N/A                      |

<sup>#</sup>Data are given as mean ± SD with range in parentheses. N/A, not applicable. <sup>§</sup>Testis-specific histone variants that are expressed exclusively in testis. The CpG sites of these histone variant genes are methylated in somatic cells but not in testis.

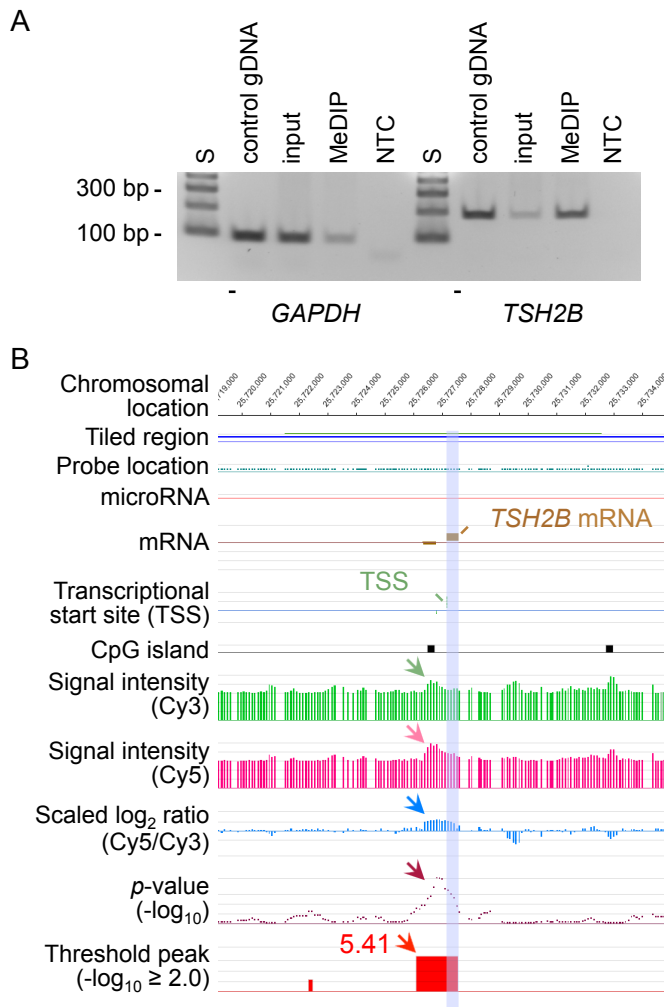

**Supplemental Figure S1.** (A) Selective enrichment of methylated DNA fragments in the MeDIP preparation. The whole genome-amplified products from immunoprecipitated and non-immunoprecipitated (input) DNA fragments were subjected to PCR amplification with primer pairs specific to the *GAPDH* and *TSH2B* genomic regions. The region amplified with the *TSH2B* primer pair corresponds to genomic locus that is unmethylated in testis and highly methylated in all somatic cells tested and was used as a control gene representing inactive methylated regions. *GAPDH* primer pair is designed from the constitutively active promoter region and used as an unmethylated negative control gene. Preferential amplification was detected for the unmethylated *GAPDH* promoter region in the input DNA and for the methylated *TSH2B* promoter region in the MeDIP DNA preparations. The expected products for the *GAPDH* and *TSH2B* primer pairs from genomic DNA template are 88 bp and 170 bp, respectively. A 100 bp ladder was used as a DNA size marker (lane S). No amplification was detected in the no template controls (NTC). Untreated genomic DNA samples were used as a positive control template in the PCR amplification assays. (B) Cytosine methylation at the positive control gene *TSH2B* was readily detected in the human myometrium methylome using MeDIP-chip analysis. Statistically significant p-values were determined by 750 bp sliding window analysis.
